# Supplementary material for: N-Glycomic Profiling of Microsatellite Unstable Colorectal Cancer
Source: MDPI journal article supplement (doi:10.3390/cancers15143571), 2023-07-11
Supplement: s1 [file s1]

## Supplementary Information

for

### N-Glycomic Profiling of Microsatellite Unstable Colorectal Cancer

Iiris Ukkola<sup>1,2</sup>, Pirjo Nummela<sup>1,2</sup>, Annamari Heiskanen<sup>3</sup>, Matilda Holm<sup>1,2,4,5†</sup>, Sadia Zafar<sup>1,2</sup>, Mia Kero<sup>1</sup>, Caj Haglund<sup>4,5</sup>, Tero Satomaa<sup>3</sup>, Soili Kytölä<sup>6</sup>, and Ari Ristimäki<sup>1,2\*</sup>

<sup>1</sup>Department of Pathology, HUSLAB, HUS Diagnostic Center, Helsinki University Hospital and University of Helsinki, Helsinki, Finland

<sup>2</sup>Applied Tumor Genomics Research Program, Research Programs Unit, University of Helsinki and Helsinki University Hospital, Helsinki, Finland

<sup>3</sup>Glykos Finland Ltd., Helsinki, Finland

<sup>4</sup>Translational Cancer Medicine Research Program, Faculty of Medicine, University of Helsinki, Helsinki, Finland

<sup>5</sup>Department of Surgery, Helsinki University Hospital and University of Helsinki, Helsinki, Finland

<sup>6</sup>Department of Genetics, HUSLAB, HUS Diagnostic Center, Helsinki University Hospital and University of Helsinki, Helsinki, Finland

<sup>†</sup>**Current address:** Science for Life Laboratory, Department of Protein Science, KTH Royal Institute of Technology, Solna, Sweden and Department of Biosciences and Nutrition, Karolinska Institutet, Huddinge, Sweden

**\*Correspondence to** Ari Ristimäki, Pathology, HUSLAB, P.O. Box 400, FI-00029 HUS, Finland. E-mail: ari.ristimaki (at) helsinki. fi

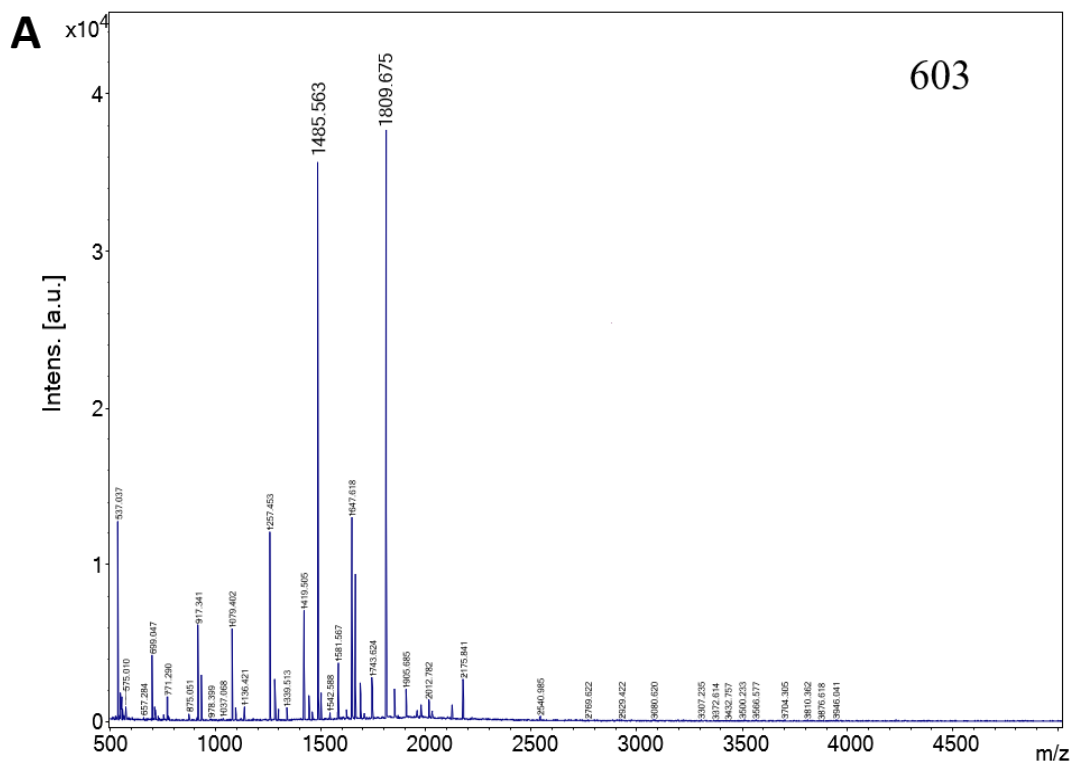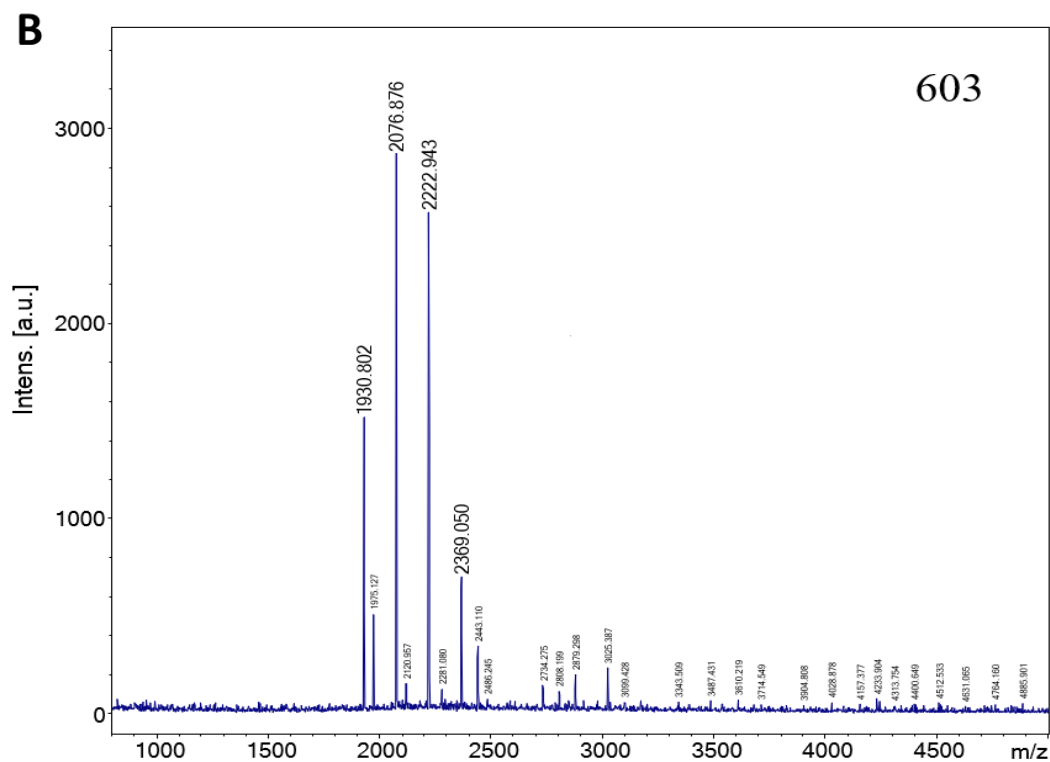

**Supplementary Figure S1.** Representative unprocessed MALDI-TOF mass spectra of (A) neutral and (B) acidic N-linked glycans isolated from a tumor tissue sample from a patient with stage II MSI BRAF<sup>V600E</sup> wild-type colon cancer. Note the different scales on y-axes.

**Supplementary Table S3.** Significantly different neutral and acidic monosaccharide compositions between controls ( $n=4$  pools) and MSI CRC samples ( $n=40$ )

|          | Ctrls       |     | MSI CRC     |     | Fold change | <i>p</i> -Adjusted <sup>a</sup> |
|----------|-------------|-----|-------------|-----|-------------|---------------------------------|
|          | Average (%) | SEM | Average (%) | SEM |             |                                 |
| NEUTRAL  |             |     |             |     |             |                                 |
| H6N2     | 11.3        | 0.7 | 8.9         | 0.4 | 0.8         | 0.032                           |
| H9N2     | 6.7         | 0.5 | 4.4         | 0.3 | 0.7         | 0.032                           |
| H10N2    | 0.2         | 0.0 | 0.1         | 0.0 | 0.5         | 0.008                           |
| H1N2     | 0.1         | 0.0 | 0.3         | 0.0 | 3.0         | 0.028                           |
| H3N2     | 3.6         | 0.3 | 2.6         | 0.2 | 0.7         | 0.043                           |
| H1N2F1   | 0.1         | 0.0 | 0.9         | 0.1 | 9.0         | 0.005                           |
| H2N2F1   | 3.4         | 0.4 | 11.7        | 0.9 | 3.4         | 0.006                           |
| H2N3F1   | 0.1         | 0.0 | 0.2         | 0.0 | 2.0         | 0.013                           |
| H3N3F1   | 0.9         | 0.1 | 1.8         | 0.1 | 2.0         | 0.013                           |
| H4N3F1   | 0.6         | 0.0 | 1.1         | 0.1 | 1.8         | 0.025                           |
| H4N3F2   | 0.1         | 0.0 | 0.3         | 0.0 | 3.0         | 0.029                           |
| H3N5     | 1.2         | 0.3 | 0.5         | 0.1 | 0.4         | 0.012                           |
| H3N5F1   | 4.3         | 0.2 | 1.6         | 0.2 | 0.4         | 0.004                           |
| H4N5F1   | 2.6         | 0.2 | 1.3         | 0.1 | 0.5         | 0.009                           |
| H5N5F1   | 2.2         | 0.4 | 0.9         | 0.1 | 0.4         | 0.004                           |
| H4N5F2   | 0.9         | 0.1 | 0.4         | 0.1 | 0.4         | 0.045                           |
| H5N5F2   | 1.2         | 0.3 | 0.2         | 0.0 | 0.2         | 0.008                           |
| H4N5F3   | 0.6         | 0.1 | 0.2         | 0.0 | 0.3         | 0.011                           |
| ACIDIC   |             |     |             |     |             |                                 |
| H5N4F3P1 | 1.0         | 0.4 | 0.3         | 0.1 | 0.3         | 0.025                           |
| H4N5F3P1 | 1.6         | 0.7 | 0.1         | 0.0 | 0.1         | <0.001                          |
| H5N5F2P1 | 1.4         | 0.7 | 0.0         | 0.0 | None in CRC | <0.001                          |
| H5N5F3P1 | 1.3         | 0.6 | 0.1         | 0.0 | 0.1         | 0.002                           |
| H5N6F4P1 | 0.6         | 0.3 | 0.1         | 0.1 | 0.2         | 0.001                           |
| H6N6F3P1 | 1.1         | 0.5 | 0.1         | 0.0 | 0.1         | 0.004                           |

<sup>a</sup>Benjamini-Hochberg; CRC, colorectal cancer; F, deoxyhexose; H, hexose; MSI, microsatellite instability; N, N-acetylhexosamine; P, acid ester; SEM, standard error of mean

**Supplementary Table S4.** Significantly different neutral monosaccharide compositions between MSS BRAFwt stage II and MSI BRAFwt stage II samples

|        | MSS St II BRAFwt |     | MSI St II BRAFwt |     | Fold change | <i>p</i> -Adjusted <sup>a</sup> |
|--------|------------------|-----|------------------|-----|-------------|---------------------------------|
|        | Average (%)      | SEM | Average (%)      | SEM |             |                                 |
| H5N2   | 15.5             | 1.3 | 8.5              | 0.8 | 0.5         | 0.001                           |
| H6N2   | 12.5             | 0.7 | 8.1              | 0.8 | 0.6         | 0.003                           |
| H7N2   | 8.1              | 0.7 | 4.9              | 0.5 | 0.6         | 0.004                           |
| H8N2   | 8.8              | 0.6 | 5.5              | 0.8 | 0.6         | 0.006                           |
| H10N2  | 0.4              | 0.1 | 0.1              | 0.1 | 0.3         | 0.011                           |
| H2N2   | 4.3              | 0.3 | 2.4              | 0.3 | 0.6         | 0.005                           |
| H3N2   | 5.0              | 0.5 | 2.6              | 0.5 | 0.5         | 0.008                           |
| H4N2   | 2.7              | 0.2 | 0.9              | 0.1 | 0.3         | <0.001                          |
| H3N3   | 0.8              | 0.1 | 0.5              | 0.1 | 0.6         | 0.025                           |
| H5N3   | 0.7              | 0.1 | 0.3              | 0.0 | 0.4         | 0.002                           |
| H6N3   | 0.7              | 0.1 | 0.4              | 0.0 | 0.6         | 0.020                           |
| H2N2F1 | 5.4              | 0.8 | 11.4             | 2.4 | 2.1         | 0.037                           |
| H4N2F1 | 0.3              | 0.0 | 0.2              | 0.0 | 0.7         | 0.024                           |
| H2N3F1 | 0.0              | 0.0 | 0.1              | 0.0 | None in MSS | 0.003                           |
| H5N3F1 | 0.4              | 0.1 | 0.1              | 0.0 | 0.3         | 0.003                           |
| H6N3F1 | 0.4              | 0.1 | 0.1              | 0.0 | 0.3         | 0.014                           |
| H3N4   | 0.7              | 0.1 | 0.5              | 0.1 | 0.7         | 0.020                           |
| H5N4   | 1.6              | 0.3 | 4.0              | 0.8 | 2.5         | 0.016                           |
| H3N4F1 | 1.6              | 0.2 | 6.5              | 1.9 | 4.1         | 0.002                           |
| H4N4F1 | 1.2              | 0.1 | 4.1              | 0.8 | 3.4         | <0.001                          |
| H5N4F1 | 1.7              | 0.2 | 11.5             | 2.0 | 6.8         | <0.001                          |
| H5N5F1 | 0.3              | 0.1 | 0.8              | 0.1 | 2.7         | 0.005                           |
| H6N5F1 | 0.3              | 0.0 | 1.4              | 0.3 | 4.7         | <0.001                          |
| H7N6F1 | 0.0              | 0.0 | 0.3              | 0.1 | None in MSS | <0.001                          |

<sup>a</sup>Benjamini-Hochberg; F, deoxyhexose; H, hexose; MSI, microsatellite instability; MSS, microsatellite stable; N, N-acetylhexosamine; St, stage; mut, mutated; wt, wild-type

**Supplementary Table S5.** Significantly different acidic monosaccharide compositions between MSS BRAFwt stage II and MSI BRAFwt stage II samples

|          | MSS St II BRAFwt |     | MSI St II BRAFwt |     | Fold change | <i>p</i> -Adjusted <sup>a</sup> |
|----------|------------------|-----|------------------|-----|-------------|---------------------------------|
|          | Average (%)      | SEM | Average (%)      | SEM |             |                                 |
| S1H4N4F1 | 1.6              | 0.2 | 0.4              | 0.1 | 0.3         | 0.001                           |
| S1H5N4F1 | 14.8             | 2.1 | 25.6             | 2.1 | 1.7         | 0.006                           |
| S1H4N5F1 | 1.5              | 0.2 | 0.3              | 0.1 | 0.2         | <0.001                          |
| S1H5N4F2 | 2.2              | 0.3 | 4.8              | 0.6 | 2.2         | 0.005                           |
| S1H4N5F2 | 0.3              | 0.1 | 0.0              | 0.0 | None in MSI | 0.010                           |
| S1H5N5F3 | 0.6              | 0.4 | 0.0              | 0.0 | None in MSI | 0.010                           |
| S2H5N4   | 4.7              | 0.7 | 18.0             | 1.7 | 3.8         | <0.001                          |
| S2H5N4F1 | 3.1              | 0.7 | 7.4              | 1.1 | 2.4         | 0.005                           |
| S2H6N5F3 | 0.1              | 0.1 | 0.6              | 0.2 | 6.0         | 0.027                           |
| S3H6N5   | 0.1              | 0.1 | 1.2              | 0.2 | 12.0        | 0.002                           |
| S3H6N5F1 | 0.1              | 0.1 | 1.1              | 0.2 | 11.0        | 0.001                           |
| H4N5F3P1 | 0.4              | 0.1 | 0.1              | 0.1 | 0.3         | 0.018                           |
| H5N5F2P1 | 0.7              | 0.3 | 0.0              | 0.0 | None in MSI | 0.026                           |
| H5N6F2P1 | 0.9              | 0.3 | 0.0              | 0.0 | None in MSI | 0.002                           |
| H5N6F3P1 | 1.2              | 0.3 | 0.1              | 0.1 | 0.1         | 0.002                           |
| H6N6F3P1 | 0.7              | 0.3 | 0.1              | 0.1 | 0.1         | 0.041                           |

<sup>a</sup>Benjamini-Hochberg; F, deoxyhexose; H, hexose; MSI, microsatellite instability; MSS, microsatellite stable; N, N-acetylhexosamine; St, stage; mut, mutated; wt, wild-type

**Supplementary Table S6.** Significantly different neutral monosaccharide compositions between MSI subgroups

|        | MSI St II BRAFwt  |     | MSI St II BRAFmut |     | Fold change   | <i>p</i> -Adjusted <sup>a</sup> |
|--------|-------------------|-----|-------------------|-----|---------------|---------------------------------|
|        | Average (%)       | SEM | Average (%)       | SEM |               |                                 |
| H2N3F1 | 0.1               | 0.0 | 0.3               | 0.1 | 3.0           | 0.011                           |
| H3N3F1 | 1.3               | 0.2 | 2.0               | 0.1 | 1.5           | 0.017                           |
|        | MSI St II         |     | MSI St IV         |     | Fold change   | <i>p</i> -Adjusted <sup>a</sup> |
|        | Average (%)       | SEM | Average (%)       | SEM |               |                                 |
| H3N4   | 0.4               | 0.0 | 0.7               | 0.1 | 1.8           | 0.033                           |
| H7N6F1 | 0.2               | 0.0 | 0.1               | 0.0 | 0.5           | 0.018                           |
|        | MSI St II BRAFwt  |     | MSI St IV BRAFwt  |     | Fold change   | <i>p</i> -Adjusted <sup>a</sup> |
|        | Average (%)       | SEM | Average (%)       | SEM |               |                                 |
| H2N3F1 | 0.1               | 0.0 | 0.3               | 0.0 | 3.0           | 0.040                           |
| H3N3F1 | 1.3               | 0.2 | 2.2               | 0.2 | 1.7           | 0.016                           |
| H4N6F1 | 0.0               | 0.0 | 0.2               | 0.0 | None in St II | 0.018                           |
| H7N6F1 | 0.3               | 0.1 | 0.1               | 0.0 | 0.3           | 0.006                           |
|        | MSI St II BRAFmut |     | MSI St IV BRAFmut |     | Fold change   | <i>p</i> -Adjusted <sup>a</sup> |
|        | Average (%)       | SEM | Average (%)       | SEM |               |                                 |
| H2N3F1 | 0.3               | 0.1 | 0.2               | 0.0 | 0.7           | 0.026                           |
|        | MSI St IV BRAFwt  |     | MSI St IV BRAFmut |     | Fold change   | <i>p</i> -Adjusted <sup>a</sup> |
|        | Average (%)       | SEM | Average (%)       | SEM |               |                                 |
| H2N3F1 | 0.3               | 0.0 | 0.2               | 0.0 | 0.7           | 0.043                           |

<sup>a</sup>Benjamini-Hochberg; F, deoxyhexose; H, hexose; MSI, microsatellite instability; N, N-acetylhexosamine; St, stage; mut, mutated; wt, wild-type

**Supplementary Table S7.** Significantly different acidic monosaccharide compositions between MSI subgroups

| MSI St II BRAFwt  |      | MSI St II BRAFmut |      | Fold change     | <i>p</i> -Adjusted <sup>a</sup> |
|-------------------|------|-------------------|------|-----------------|---------------------------------|
| Average (%)       | SEM  | Average (%)       | SEM  |                 |                                 |
| S1H4N5F1          | 0.3  | 0.1               | 0.0  | None in BRAFmut | 0.032                           |
| S2H5N4            | 18.0 | 1.7               | 33.2 | 1.8             | 0.043                           |
| S1H5N5F1          | 1.0  | 0.2               | 0.2  | 0.2             | 0.040                           |
| S1H6N5            | 0.7  | 0.1               | 0.0  | None in BRAFmut | 0.002                           |
| S2H6N5            | 0.4  | 0.2               | 0.0  | None in BRAFmut | 0.045                           |
| S3H6N5            | 1.2  | 0.2               | 0.2  | 0.2             | 0.009                           |
| S2H6N5F3          | 0.6  | 0.2               | 0.0  | None in BRAFmut | 0.022                           |
| MSI St II         |      | MSI St IV         |      | Fold change     | <i>p</i> -Adjusted <sup>a</sup> |
| Average (%)       | SEM  | Average (%)       | SEM  |                 |                                 |
| S1H4N4F1          | 0.3  | 0.1               | 0.8  | 2.7             | 0.010                           |
| S2H6N5            | 0.2  | 0.1               | 0.6  | 3.0             | 0.010                           |
| S2H7N6F1          | 0.1  | 0.1               | 0.5  | 5.0             | 0.008                           |
| MSI St II BRAFwt  |      | MSI St IV BRAFwt  |      | Fold change     | <i>p</i> -Adjusted <sup>a</sup> |
| Average (%)       | SEM  | Average (%)       | SEM  |                 |                                 |
| S1H4N4F1          | 0.4  | 0.1               | 1.0  | 2.5             | 0.040                           |
| S1H6N5            | 0.7  | 0.1               | 0.2  | 0.3             | 0.009                           |
| MSI St II BRAFmut |      | MSI St IV BRAFmut |      | Fold change     | <i>p</i> -Adjusted <sup>a</sup> |
| Average (%)       | SEM  | Average (%)       | SEM  |                 |                                 |
| S1H4N5F1          | 0.0  | 0.0               | 0.5  | None in St II   | 0.008                           |
| S2H5N4            | 33.2 | 5.4               | 17.5 | 0.5             | 0.045                           |
| S1H5N5F1          | 0.2  | 0.2               | 1.3  | 6.5             | 0.016                           |
| S1H6N5            | 0.0  | 0.0               | 0.7  | None in St II   | 0.003                           |
| S2H6N5            | 0.0  | 0.0               | 0.7  | None in St II   | 0.001                           |
| S1H6N5F2          | 0.0  | 0.0               | 0.3  | None in St II   | 0.030                           |
| S3H6N5            | 0.2  | 0.1               | 1.2  | 6.0             | 0.020                           |
| S2H7N6F1          | 0.0  | 0.0               | 0.5  | None in St II   | 0.017                           |
| MSI St IV BRAFwt  |      | MSI St IV BRAFmut |      | Fold change     | <i>p</i> -Adjusted <sup>a</sup> |
| Average (%)       | SEM  | Average (%)       | SEM  |                 |                                 |
| S1H4N4F1          | 1.0  | 0.2               | 0.5  | 0.5             | 0.043                           |
| S1H5N5F1          | 0.8  | 0.1               | 1.3  | 1.6             | 0.042                           |
| S1H6N5            | 0.2  | 0.1               | 0.7  | 3.5             | 0.018                           |

<sup>a</sup>Benjamini-Hochberg; F, deoxyhexose; H, hexose; MSI, microsatellite instability; N, N-acetylhexosamine; St, stage; mut, mutated; wt, wild-type
